# Supplementary material for: Dishevelled limits Notch signalling through inhibition of CSL
Source: PubMed Central journal article supplement — Development. 2012 Dec 1;139(23):4405–15. doi: 10.1242/dev.081885 (PMC3509734; doi:10.1242/dev.081885), 2012-12-01
Supplement: supp_139.23.4405_DEV081885.pdf [file supp_139.23.4405_DEV081885.pdf]

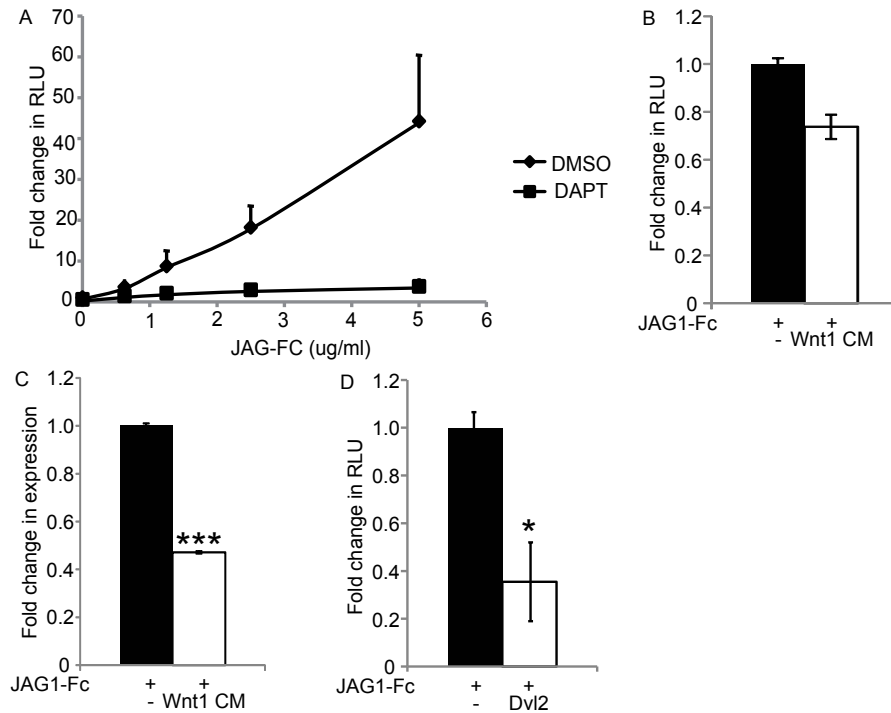

**Fig. S1. Dishevelled inhibits Notch signalling.** (A) SHEP-RBPJ $\kappa$ -Luc cells were cultured on plastic treated with different concentrations of JAG1-Fc ligand for 24 hours before analysing luciferase activity. DAPT (4  $\mu$ M) was added as indicated to inhibit  $\gamma$ -secretase function. Data are presented as mean fold change ( $\pm$ s.e.m.) in relative luciferase units (RLU) compared with control cells cultured on plastic treated with 0  $\mu$ g/ml Jag1-Fc ligand. Immobilised JAG1-Fc induced luciferase expression in a dose-dependent manner that was abolished by DAPT treatment. (B,C) SHEP-RBPJ $\kappa$ -Luc cells were cultured for 24 hours on plastic treated with 2  $\mu$ g/ml JAG1-Fc and treated with conditioned medium from control or Wnt1-expressing SHEP cells for the last 12 hours before lysis. (B) Data are presented as mean fold change ( $\pm$ s.e.m.) in relative luciferase units (RLU) compared with control cells. Jag1-Fc-induced luciferase expression was lower after treatment with Wnt1-conditioned medium (two-tailed t-test). (C) qRT-PCR analysis of Notch target, *HES1*, in SHEP-RBPJ $\kappa$ -Luc cells. Expression was normalised to *HPRT1*. Data are presented as mean fold change ( $\pm$ s.e.m.) in normalised expression values relative to control cells. *HES1* expression was significantly reduced in cells treated with Wnt1-conditioned medium (two-tailed t-test). (D) Control or Dvl2-expressing SHEP-RBPJ $\kappa$ -Luc cells were cultured on plastic treated with the soluble ligand JAG1-Fc. Data are presented as mean fold change ( $\pm$ s.e.m.) in ligand-induced reporter activity [measured in relative luciferase units (RLU)] compared with control cells. Notch signalling was significantly lower in Dvl2-expressing cells than controls (two-tailed t-test).  $^{\dagger}P=0.052$ ,  $*P<0.05$ ,  $***P<0.001$ .

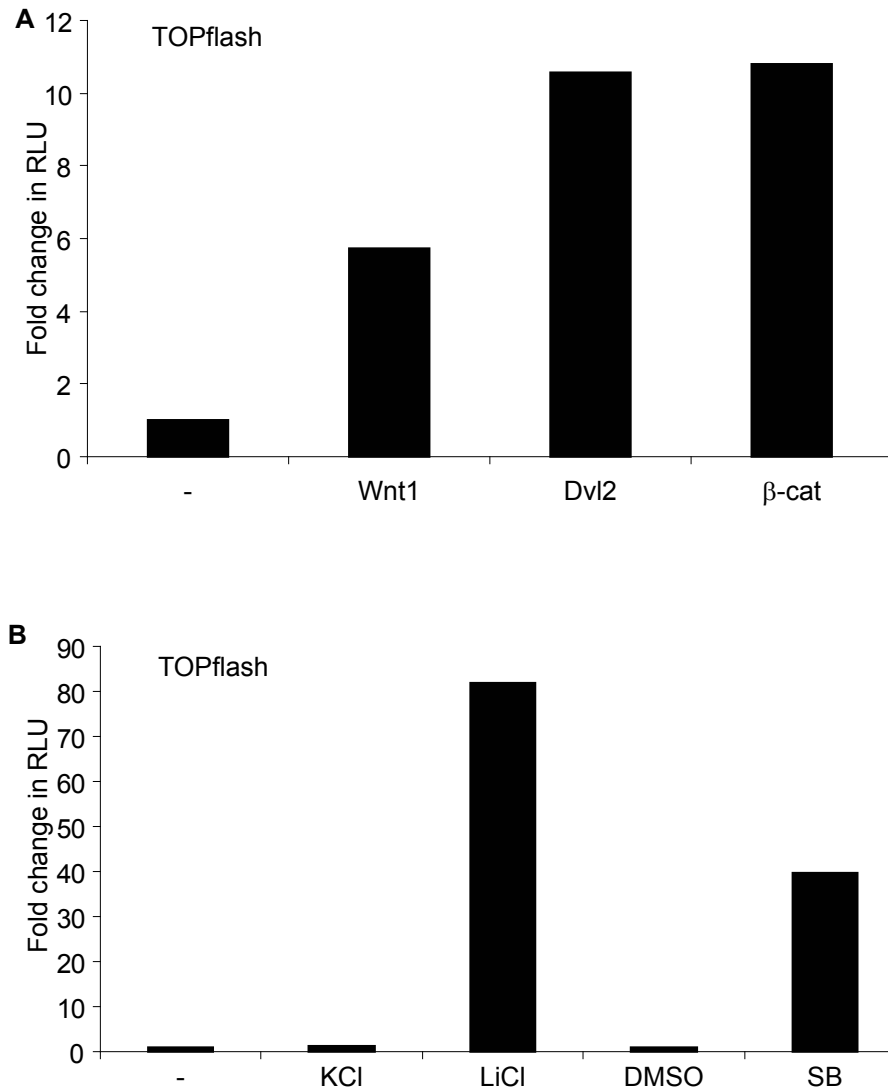

**Fig. S2. Activation of Wnt signalling by Wnt pathway components and GSK3 $\beta$  inhibitors.** HEK 293T cells were transfected with the Wnt reporter construct (TOPflash) and a *Renilla* luciferase control construct (pRL-CMV). Wnt signalling was activated by co-transfection of vectors encoding Wnt pathway components or drug treatments, as indicated. Data are presented as mean fold increase in relative luciferase units (RLU), relative to the corresponding negative control. **(A)** Expression of Wnt pathway components activates signalling. Fold increase in RLU in response to expression of mWnt1, mDvl2, S45F m $\beta$ -catenin ( $\beta$ -cat) or empty vector control. **(B)** GSK3 $\beta$  inhibitors activate Wnt signalling. Cells were treated overnight with 20 mM LiCl or 10  $\mu$ M SB216763 (SB) to inhibit GSK3 $\beta$ , and the respective controls of 20 mM KCl or DMSO are shown. These are the same conditions used to active Wnt signalling as in Fig. 1.

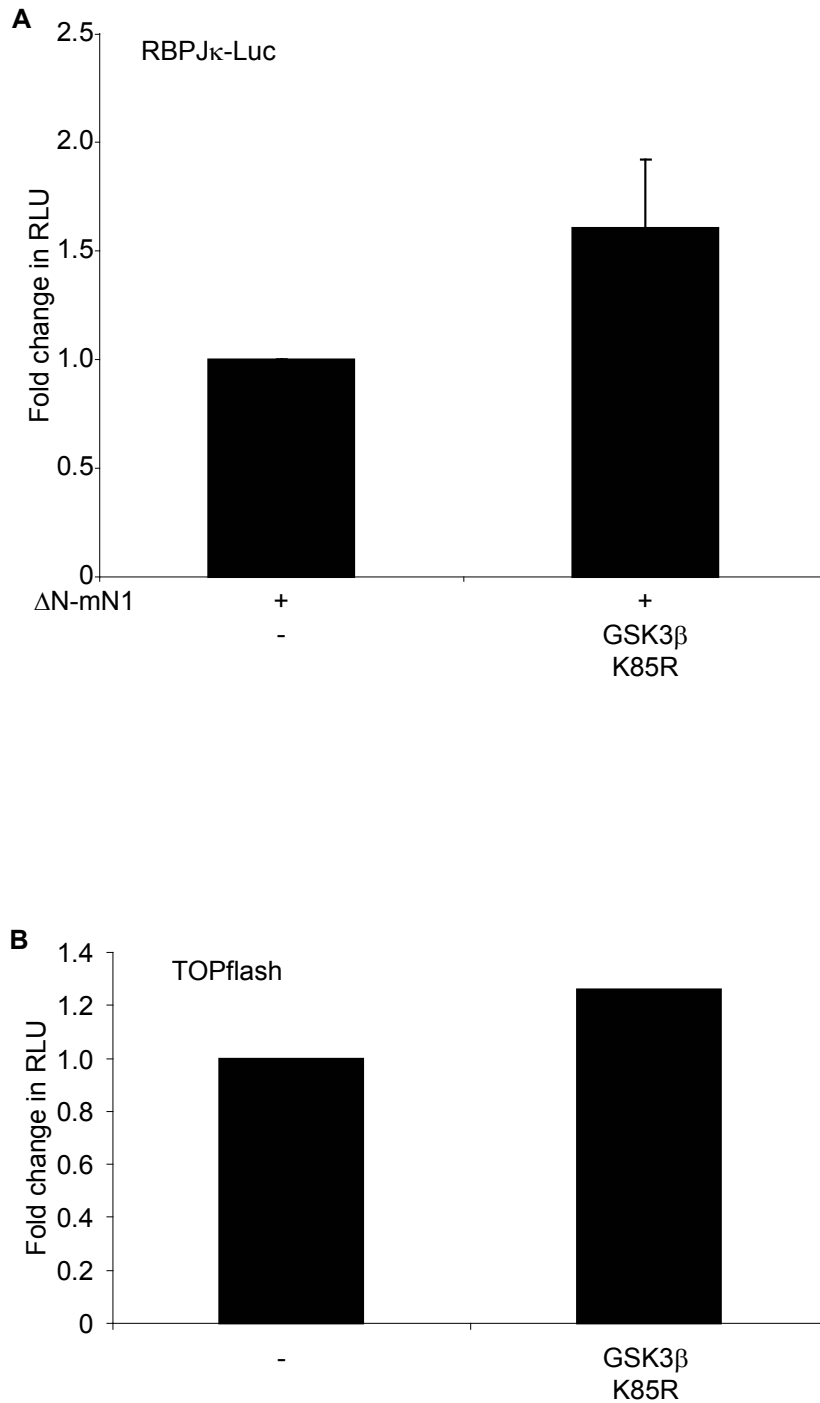

**Fig. S3. GSK3 $\beta$  K85R does not inhibit Notch signalling.** (A) GSK3 $\beta$  K85R expression does not inhibit Notch signalling. CHO-K1 cells were transfected with the RBPJ $\kappa$ -reporter construct (RBPJ $\kappa$ -Luc) and a *Renilla* luciferase control construct (pRL-CMV). Notch and Wnt signalling were activated by expression of  $\Delta$ N-mN1 and GSK3 $\beta$  K85R. Data are presented as mean fold change ( $\pm$ s.e.m.) in relative luciferase units (RLU) compared with  $\Delta$ N-mN1 alone. GSK3 $\beta$  K85R did not inhibit  $\Delta$ N-mN1 activity ( $P>0.05$ ). (B) Activation of Wnt signalling by GSK3 $\beta$  K85R. Cells were transfected with the Wnt reporter construct (TOPflash) and pRL-CMV. Wnt signalling was activated by expression of GSK3 $\beta$  K85R. Data are presented as mean fold increase in relative luciferase units (RLU), relative to the negative control.

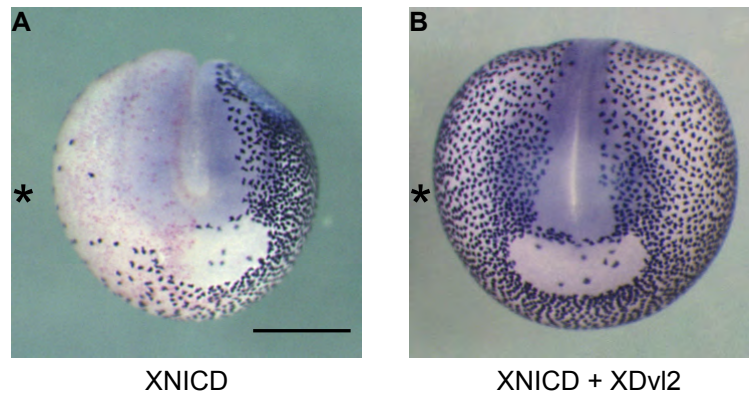

**Fig. S4. Dishevelled rescues the XNICD phenotype in vivo.** (A,B) Anterior views of the same *Xenopus* embryos that are shown in Fig. 2F,H. The injected side is marked with an asterisk. Scale bar: 500  $\mu$ m.

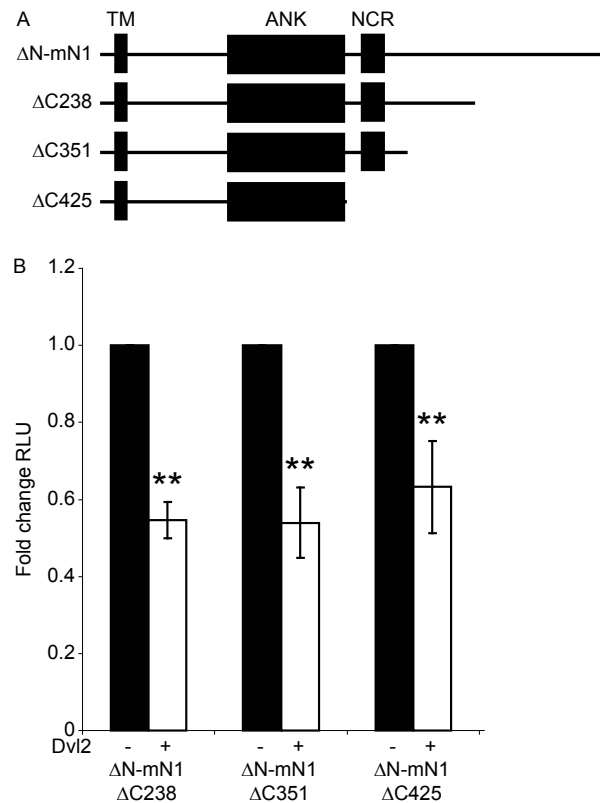

**Fig. S5. Dishevelled inhibits  $\Delta$ N-mN1 C-terminal deletion mutants.** (A) Schematic of the Notch constructs used in the C-terminal deletion study. TM, transmembrane domain; ANK, Ankyrin repeats. (B) CHO-K1 cells were transfected with the RBPJ $\kappa$ -reporter construct (RBPJ $\kappa$ -Luc) and a *Renilla* luciferase control construct (pRL-CMV). Notch and Wnt signalling were activated by expression of mDvl2 with  $\Delta$ N-mN1 or one of the  $\Delta$ N-mN1 deletion constructs:  $\Delta$ C238,  $\Delta$ C351 and  $\Delta$ C425. Data are presented as mean fold change ( $\pm$ s.e.m.) in relative luciferase units (RLU), relative to each construct expressed alone. Dishevelled significantly inhibited each Notch construct (\*\* $P$ <0.01, one-way ANOVA and Tukey's post-hoc test).

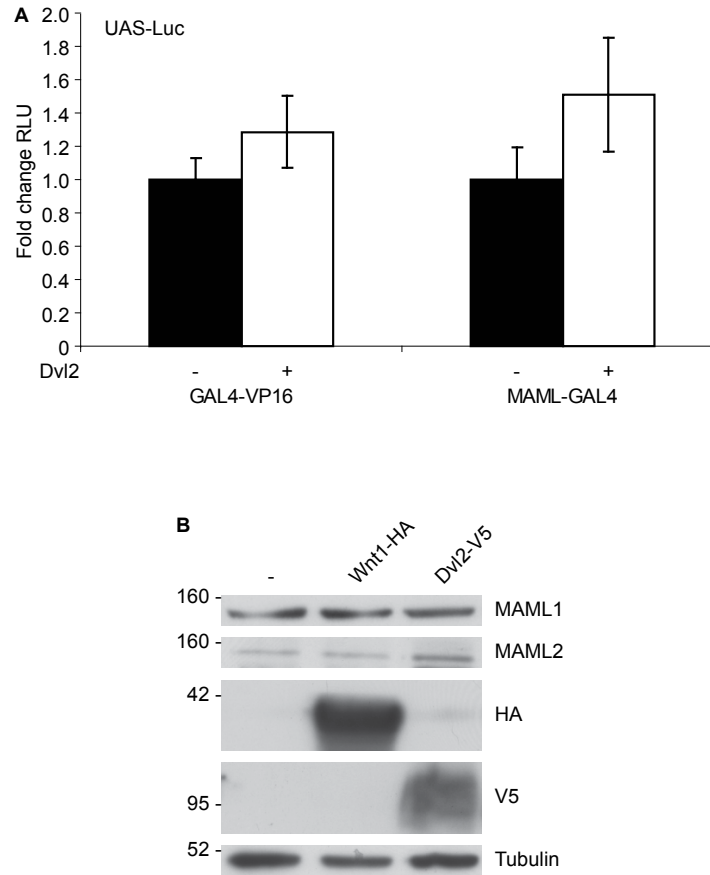

**Fig. S6. Dishevelled does not inhibit MAML.** (A) CHO-K1 cells were transfected with the GAL4-reporter construct (UAS-Luc) and a *Renilla* luciferase control construct (pRL-CMV). The transcriptional reporter was activated by co-expression of either GAL4-VP16 or MAML-GAL4. Data are presented as mean fold change ( $\pm$ s.e.m.) in relative luciferase units (RLU), relative to each construct expressed alone. Dishevelled co-expression did not inhibit the activity of either construct ( $P>0.05$ ). (B) Wnt signalling does not reduce the expression of MAML. Cells were transfected with expression constructs encoding either Wnt1-HA or Dvl2-V5. Lysates were analysed by immunoblotting to examine the expression of endogenous MAML1 and MAML2. HA, V5 and Tubulin are shown as controls. The position of molecular weight markers are shown (in kDa).

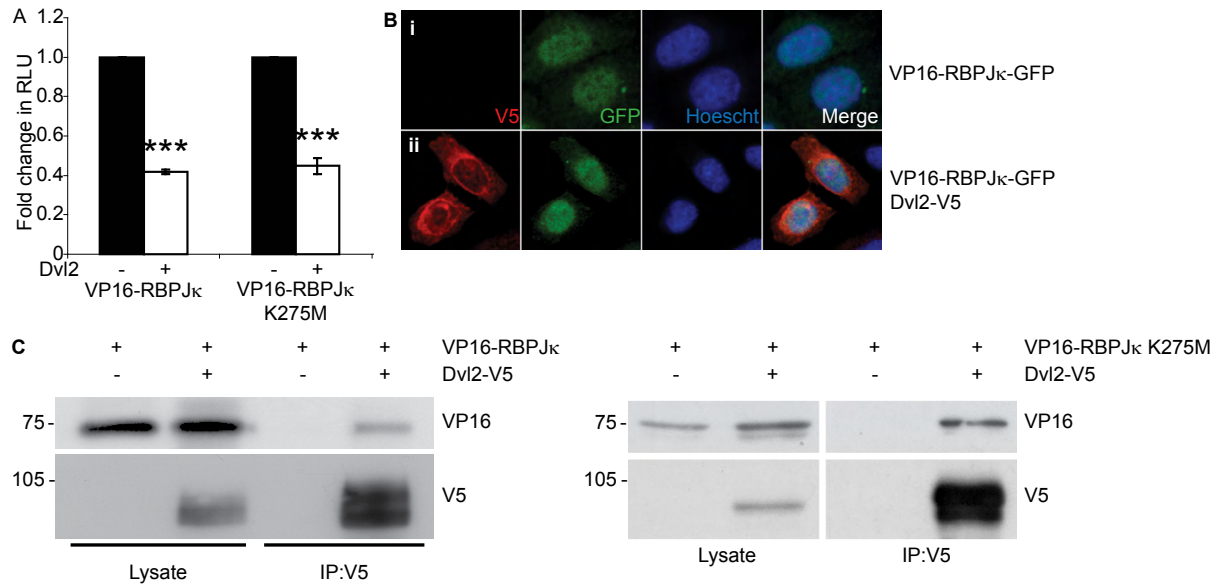

**Fig. S7. Dishevelled inhibits CSL transcription factors.** (A) Dishevelled inhibits a VP16-RBPJ $\kappa$  molecule that cannot bind NICD. CHO-K1 cells were transfected with RBPJ $\kappa$ -Luc and pRL-CMV. Notch and Wnt signalling were activated by co-transfection of vectors encoding VP16-RBPJ $\kappa$  or VP16-RBPJ $\kappa$ -K275M and mDvl2, as indicated. Data are presented as mean fold change ( $\pm$ s.e.m.) in relative luciferase units (RLU), relative to each RBPJ $\kappa$  molecule alone. mDvl2 inhibited both VP16-RBPJ $\kappa$  constructs (\*\*\* $P$ <0.001, one-way ANOVA and Tukey's post-hoc test). (B) Dishevelled does not alter the nuclear localisation of RBPJ $\kappa$ . Cells expressing VP16-RBPJ $\kappa$ -GFP and mDvl2-V5, as indicated, were fixed and immunostained for GFP (green) and V5 (red) epitopes. (C,D) Dishevelled binds RBPJ $\kappa$  and a form of RBPJ $\kappa$  that cannot bind NICD. CHO-K1 cells expressing mDvl2-V5 and VP16-RBPJ $\kappa$  (C) or VP16-RBPJ $\kappa$ -K275M (D) were subjected to immunoprecipitation (IP) using V5 antibody. IP samples were analysed by western blotting with V5 and VP16 antibodies, alongside total lysates. Positions of molecular weight markers (in kDa) are shown.

**Table S1. Molecular cloning primers used**

| Primer name                  | Sequence                            |
|------------------------------|-------------------------------------|
| N1 5210F                     | TAGTAAGCTTGTGAAGAGTGAGCCGGTGGA      |
| N1 5589R                     | TGCTGCTGAGTCCACTGTCT                |
| N1 5970F                     | AGGGTGTCTTCCAGATCCTGCTCCG           |
| N1 6400R                     | TACGCTCGAGGTTGTACTCATCCAAAAGCCGCACG |
| m $\beta$ -cat S45FF         | ACCACCACAGCTCCTTTCCTGAGTGGCAAGGGC   |
| m $\beta$ -cat S45FR         | GCCGTTGCCACTCAGGAAAGGAGCTGTGGTGGT   |
| m $\beta$ -cat 1914F         | GAGATAGTAGAAGGGTGTACTGG             |
| m $\beta$ -cat 2555R         | CCTACTCGAGGTCAGTATCAAACCAGG         |
| RBPJ $\kappa$ K275MF         | CGGGCAGACTGTCATGCTTGTGTGCTCAGTG     |
| RBPJ $\kappa$ K275MR         | CACTGAGCACACAAGCATGACAGTCTGCCCCG    |
| hN4 4357F                    | TACCAAGCTTCCCCCTGCTGCCTGGACCA       |
| hN4 4563R                    | AGGCCGTCGAGTGAAACCA                 |
| RBPJ $\kappa$ <i>Bg</i> /IIF | CAGTAAGATCTATGCCCTCCGGTTTTTCCT      |
| RBPJ $\kappa$ <i>Bg</i> /IIR | CTGAAGATCTGGACACCACGGTTGCTGT        |
| T7                           | TAATACGACTCACTATAGGG                |
| BGHR                         | TAGAAGGCACAGTCGAGG                  |
| mDvl2 132R                   | GATCGGCGCCCGCCATGGTCTCGCT           |
| mDvl2 1654F                  | GATCGCCGGCTGTGAGAGTTAC              |
| mDvl2 793F                   | ACTGAGCAGAGCAGTGCCT                 |
| mDvl2 1668R                  | CACGCTCGAGGTAAGTCTCACAGCCACCA       |
| mMAML1 176F                  | GATCGGCCATGGAGGCCATCGCGGGCGCTGGAGGC |
| mMAML1 548R                  | AGTTGTGTGAAACAGAGT                  |

**Table S2. qRT-PCR primers used**

| Gene                               | Forward primer sequence      | Reverse primer sequence     |
|------------------------------------|------------------------------|-----------------------------|
| <i>HES1</i>                        | AAAGATAGCTCGCGGCATT          | TGCTTCACTGTCATTTCCAGA       |
| <i>HEY1</i>                        | TATCGGAGTTTGGGATTTTCG        | GCATCTAGTCCTTCAATGATG<br>CT |
| <i>HPRT1</i>                       | TGACCTTGATTTATTTTGCATA<br>CC | CGAGCAAGACGTTTCAGTACT       |
| <i><math>\alpha</math>-tubulin</i> | GCAGGAAAGCATGTCCCCA          | TGGCAGCATCTTCCTTTCCA        |
| <i>esr1</i>                        | CAGCACCAGCTCACAGTGCA         | GCGCATCTTTTCCACAATGG        |
| <i>rpl8</i>                        | TACGCCACCGTTATCTCCCA         | CGACCACCACCAGCAACAAC        |

**Table S3. Primary antibodies used**

| Antigen                        | Source                                       |
|--------------------------------|----------------------------------------------|
| $\beta$ -gal                   | Promega, Madison, USA                        |
| <i>Renilla</i> luciferase      | Millipore, Billerica, USA                    |
| Cleaved-Notch1 (NICD Val 1744) | Rockland Immunochemicals, Gilbertsville, USA |
| Dvl2                           | Cell Signaling Technology, Danvers, USA      |
| GFP                            | Invitrogen, Carlsbad, USA                    |
| LaminB1                        | Abcam, Cambridge, UK                         |
| myc (4A6 clone)                | Millipore                                    |
| RBPJ $\kappa$ (clone T6709)    | Institute of Immunology Co, Tokyo, Japan     |
| VP16                           | Santa Cruz Biotechnology California, USA     |
| V5                             | Invitrogen                                   |
| Tubulin                        | Keith Gull, University of Manchester, UK     |
